# Supplementary material
Source: Frontiers journal article supplement (https://www.frontiersin.org/articles/453637)
Supplement: Data_Sheet_2.xls [file Data_Sheet_2.xls]

## Sheet: Tophit_species_distribution_bar
Species	#BLAST Top-Hits
Leishmania mexicana MHOM/GT/2001/U1103	4358
Homo sapiens	2752
Streptococcus pneumoniae	2499
Porphyra umbilicalis	1993
Perkinsus marinus ATCC 50983	1934
Leishmania infantum	1229
Mycobacterium leprae	1225
Mycobacterium leprae Br4923	1167
Mus musculus	1165
Mycobacterium leprae Kyoto-2	1140
Mycobacterium leprae TN	1134
synthetic construct	1031
Mycobacterium leprae 3125609	1023
Mycobacterium leprae 7935681	1012
Burkholderia pseudomallei	987
Mytilus galloprovincialis	961
Xenopus laevis	814
Rattus norvegicus	752
Human immunodeficiency virus 1	725
Branchiostoma floridae	673
Cryptotermes secundus	612
Aureococcus anophagefferens	597
Anaeromyxobacter dehalogenans 2CP-C	546
Xenopus tropicalis	543
Macrostomum lignano	541
Limulus polyphemus	522
Eimeria mitis	503
Hyalella azteca	469
Zootermopsis nevadensis	455
Daphnia pulex	444
Pan troglodytes	409
Oryza sativa Japonica Group	405
Daphnia magna	388
Zea mays	379
Danio rerio	369
Burkholderia pseudomallei 1710b	361
Mytilus edulis	354
Mytilus californianus	343
Caenorhabditis brenneri	336
Frankliniella occidentalis	335
Octopus bimaculoides	329
Tetraclita serrata	318
Chara braunii	317
Bos taurus	315
Eimeria necatrix	315
Centruroides sculpturatus	311
Bombyx mori	310
Human ORFeome Gateway entry vector	300
Pongo abelii	271
Stylophora pistillata	270
Latrodectus hesperus	260
Aethina tumida	257
Eimeria brunetti	256
Nematostella vectensis	253
Conexibacter woesei	247
Blattella germanica	244
Bacillus megaterium	240
Lingula anatina	239
Plasmodium malariae	238
Strongylocentrotus purpuratus	235
Tribolium castaneum	233
Eurytemora affinis	232
Biomphalaria glabrata	231
Clavibacter michiganensis subsp. michiganensis	231
Gallus gallus	227
Sus scrofa	227
Quercus suber	226
Helianthus annuus	226
Conexibacter woesei DSM 14684	224
Eimeria praecox	219
Mytilus trossulus	218
Drosophila melanogaster	214
Nilaparvata lugens	212
Folsomia candida	208
Macaca fascicularis	203
Emiliania huxleyi CCMP1516	201
Saccoglossus kowalevskii	199
Culex quinquefasciatus	198
Mycobacterium tuberculosis	197
Panicum hallii var. hallii	194
Branchiostoma belcheri	193
Cricetulus griseus	190
Ixodes scapularis	189
Halyomorpha halys	189
Mizuhopecten yessoensis	186
Aedes aegypti	185
Bemisia tabaci	185
Burkholderia mallei	182
Orchesella cincta	176
Exaiptasia pallida	175
Macaca mulatta	175
Cucumis melo	174
Parasteatoda tepidariorum	173
Streptomyces ipomoeae 91-03	173
Pediculus humanus corporis	171
Priapulus caudatus	171
Enterococcus faecalis	171
Sorangium cellulosum	170
Ctenocephalides felis	169
Pan paniscus	168
Crassostrea gigas	165
Escherichia coli	165
Gorilla gorilla gorilla	165
Amphibalanus amphitrite	164
Anopheles gambiae str. PEST	163
Cimex lectularius	156
Candidatus Rokubacteria bacterium	155
Oryctolagus cuniculus	155
Eimeria acervulina	154
Anodonta cygnea	153
Nomascus leucogenys	151
Onthophagus taurus	150
Amphimedon queenslandica	149
Salmo salar	147
Oreochromis niloticus	146
Bodo saltans	145
Dendroctonus ponderosae	143
Canis lupus familiaris	143
Leptinotarsa decemlineata	142
Eimeria tenella	142
Ciona intestinalis	139
Burkholderia thailandensis E444	139
Pomacea canaliculata	139
Acidobacteria bacterium	138
Panicum hallii	137
Agrilus planipennis	135
Bacillus massilionigeriensis	132
Equus caballus	131
Capitella teleta	131
Nicrophorus vespilloides	130
Leishmania major strain Friedlin	130
Mycobacteroides abscessus	129
Apostichopus japonicus	127
Anoplophora glabripennis	127
Crassostrea virginica	127
Helicoverpa armigera	125
Trichuris suis	124
Cavia porcellus	124
Stegodyphus mimosarum	122
Nephila clavipes	122
Micromonospora pattaloongensis	122
Pseudocohnilembus persalinus	122
Tetraodon nigroviridis	121
Chlamydomonas reinhardtii	118
Plasmodium falciparum	117
Cephus cinctus	114
Fabibacter misakiensis	114
Aplysia californica	113
Musculista senhousia	112
Drosophila willistoni	111
Callithrix jacchus	109
Drosophila serrata	109
Dasypus novemcinctus	109
Burkholderia pseudomallei 576	108
Ovis aries	108
Canis lupus dingo	108
Serinus canaria	108
Paraburkholderia sediminicola	107
Oncorhynchus mykiss	107
Ailuropoda melanoleuca	106
Lysobacter enzymogenes	105
Diaphorina citri	104
Athalia rosae	104
Symbiodinium microadriaticum	104
Anopheles sinensis	103
Lucilia cuprina	102
Aedes albopictus	102
Mus caroli	102
Drosophila simulans	101
Strigomonas culicis	101
Camponotus floridanus	100
Nothobranchius furzeri	99
Raphidocelis subcapitata	99
Oncorhynchus tshawytscha	98
Testicularia cyperi	97
Plasmodium vivax	97
Orbicella faveolata	97
Oikopleura dioica	97
Monodelphis domestica	97
Arthrobotrys oligospora ATCC 24927	96
Sugiyamaella lignohabitans	96
Micromonas pusilla CCMP1545	95
Neodiprion lecontei	95
Acanthaster planci	95
Acropora digitifera	94
Pogona vitticeps	94
Pseudonocardia sp. CNS-139	94
Galeopterus variegatus	93
Amyelois transitella	93
Anolis carolinensis	93
Fopius arisanus	91
Drosophila ananassae	91
Burkholderia cenocepacia	90
Nasonia vitripennis	90
Saccharomyces cerevisiae	89
Harpegnathos saltator	89
Pseudomonas aeruginosa	89
Sandaracinus amylolyticus	89
Drosophila grimshawi	89
Mus pahari	88
Heterocephalus glaber	88
Lasius niger	88
Eimeria maxima	87
Lottia gigantea	87
Bacillus aryabhattai	87
Streptococcus agalactiae	86
Diachasma alloeum	86
Actinosynnema pretiosum subsp. pretiosum	86
Rhagoletis zephyria	85
Pseudonocardia sp. AL041005-10	84
Ooceraea biroi	84
Orussus abietinus	84
Astyanax mexicanus	84
Piliocolobus tephrosceles	83
Carassius auratus	83
Xanthobacter autotrophicus	83
Stomoxys calcitrans	82
Microplitis demolitor	82
Austrofundulus limnaeus	81
Anopheles darlingi	80
uncultured bacterium	80
Loxodonta africana	80
Cyprinus carpio	80
Sinocyclocheilus anshuiensis	80
Plutella xylostella	79
Bacillus shackletonii	79
Gemmatirosa kalamazoonesis	79
Copidosoma floridanum	79
Rhodotorula graminis WP1	79
Halopiger goleimassiliensis	79
Candida] boidinii	78
Bacillus megaterium NBRC 15308 = ATCC 14581	78
Bacillus sp. 1NLA3E	78
Drosophila mojavensis	78
Babesia bovis	77
Bicyclus anynana	76
Hydra vulgaris	76
Pelistega sp. MC2	75
Rozella allomycis CSF55	75
Burkholderia ubonensis	75
Nannocystis exedens	74
Staphylococcus aureus	74
Drosophila virilis	74
Musca domestica	74
Drosophila obscura	74
Megachile rotundata	74
Actinosynnema pretiosum	73
Artemia franciscana	73
Macaca nemestrina	72
Mytilus chilensis	72
Bacillus megaterium NCT-2	72
Hordeum vulgare subsp. vulgare	72
Ancylostoma caninum	72
Pseudomyrmex gracilis	71
Taeniopygia guttata	71
Caenorhabditis elegans	71
Bombus impatiens	71
Vigna angularis	70
Antrostomus carolinensis	70
Torque teno virus	70
Anopheles gambiae	69
Trichinella spiralis	69
Salpingoeca rosetta	69
Anaeromyxobacter sp. PSR-1	69
Ceratitis capitata	69
Drosophila persimilis	68
Bos indicus	68
Theropithecus gelada	68
Neospora caninum Liverpool	67
Ornithorhynchus anatinus	67
Papio anubis	67
Bacillus aquimaris	66
Drosophila hydei	66
Meleagris gallopavo	66
Trichogramma pretiosum	66
Rhinopithecus bieti	65
Ictalurus punctatus	65
Pacifastacus leniusculus	65
Mesocricetus auratus	65
Naegleria gruberi	65
Phragmatopoma californica	65
Rathayibacter tanaceti	65
Acyrthosiphon pisum	64
Bacillus smithii	64
Pieris rapae	64
Quadrula quadrula	64
Scleropages formosus	64
Spodoptera litura	64
Cercocebus atys	63
Deltaproteobacteria bacterium HGW-Deltaproteobacteria-14	63
Psilocybe cyanescens	63
Felis catus	63
Arabidopsis thaliana	63
Kandleria vitulina	62
Vanessa tameamea	62
Balanus glandula	62
Kitasatospora cheerisanensis KCTC 2395	62
Boleophthalmus pectinirostris	62
Besnoitia besnoiti	61
Paenibacillus tianmuensis	61
Sipha flava	61
Drosophila erecta	61
Sinosporangium album	60
Oryzias latipes	60
Drosophila pseudoobscura pseudoobscura	60
Brachypodium distachyon	60
Xiphophorus maculatus	59
Drosophila navojoa	59
Equus przewalskii	59
Gemmatimonadetes bacterium	59
Papilio xuthus	59
Ancylostoma ceylanicum	58
Rhinopithecus roxellana	58
Minicystis rosea	58
Sporothrix schenckii ATCC 58251	58
Perna viridis	58
Hyposmocoma kahamanoa	58
Locusta migratoria migratoria	58
Dufourea novaeangliae	58
Habropoda laboriosa	58
Salvelinus alpinus	58
Bos mutus	58
Enhydra lutris kenyoni	57
Latimeria chalumnae	57
Danaus plexippus plexippus	57
Oncorhynchus kisutch	57
Mus musculus domesticus	57
Trametes coccinea BRFM310	57
Trichoplax adhaerens	56
Drosophila sechellia	56
Rhizoclosmatium globosum	56
Achromobacter xylosoxidans NBRC 15126 = ATCC 27061	56
Trachymyrmex cornetzi	56
Wasmannia auropunctata	56
Streptomyces	56
Eudistoma reginum	56
Bordetella pertussis	56
Burkholderia anthina	55
Procambarus clarkii	55
Pristionchus pacificus	55
Pythium insidiosum	55
Sabellaria alveolata	54
Mycobacteroides abscessus subsp. abscessus	54
Ceratosolen solmsi marchali	54
Clavibacter michiganensis	54
Paramormyrops kingsleyae	54
Cadophora sp. DSE1049	54
Polistes dominula	54
Lonchura striata domestica	53
Linepithema humile	53
Bathymodiolus azoricus	53
Drosophila kikkawai	53
Bacillus sp. URHB0009	53
Burkholderia sp. BT03	53
Agrococcus jejuensis	52
Ectocarpus siliculosus	52
Enterococcus faecium	52
Sinocyclocheilus grahami	52
Clunio marinus	52
Heliothis virescens	52
Bison bison bison	52
Dinoponera quadriceps	52
Jiangella sp. DSM 45060	52
Eufriesea mexicana	51
Cellulosimicrobium sp. CUA-896	51
Fundulus heteroclitus	51
Callorhinchus milii	51
Plasmodium ovale curtisi	51
Takifugu rubripes	51
Caenorhabditis remanei	50
Bacteroidales bacterium WCE2008	50
Helobdella robusta	49
Mycobacterium lepromatosis	49
Bombus terrestris	49
Semibalanus balanoides	49
Temnothorax curvispinosus	49
Papilio machaon	49
Trachymyrmex zeteki	49
Bubalus bubalis	48
Solirubrobacter soli	48
Micromonospora sp. MH33	48
Hippocampus comes	48
Polistes canadensis	48
Aotus nancymaae	48
Tetranychus urticae	48
Clupea harengus	48
Burkholderia pseudomallei NCTC 13179	48
Oryctes borbonicus	47
Actinomadura sp. CNU-125	47
Drosophila yakuba	47
Cyphomyrmex costatus	47
Chlorocebus sabaeus	47
Volvox carteri f. nagariensis	47
Capsaspora owczarzaki ATCC 30864	47
Melipona quadrifasciata	47
Esox lucius	47
Proteobacteria bacterium	47
Monosiga brevicollis MX1	46
Phytophthora capsici	46
Tropilaelaps mercedesae	46
Burkholderia cepacia	46
Burkholderia dolosa AU0158	46
Desmodus rotundus	46
Ceratina calcarata	46
Chrysochromulina sp. CCMP291	46
Hypsibius dujardini	46
Colobus angolensis palliatus	45
Haloferax sp. SB29	45
Vollenhovia emeryi	45
Lactobacillus plantarum	45
Oryzias melastigma	45
Melanaphis sacchari	45
Human betaherpesvirus 6B	45
Zeugodacus cucurbitae	45
Monoraphidium neglectum	45
Perna perna	45
Vulpes vulpes	44
Tetrabaena socialis	44
Bacillus toyonensis BCT-7112	44
Larimichthys crocea	44
Burkholderia cenocepacia KC-01	44
Anabas testudineus	44
Drosophila guanche	44
Monomorium pharaonis	44
Amphibalanus improvisus	44
Carcinoscorpius rotundicauda	44
Paralichthys olivaceus	43
Columba livia	43
Astatotilapia calliptera	43
Drosophila elegans	43
Solenopsis invicta	43
Staphylococcus epidermidis	43
Kineosporia sp. A_224	43
Erinaceus europaeus	43
Jiangella sp. GTF31	43
Galendromus occidentalis	42
Drosophila ficusphila	42
Varroa jacobsoni	42
Salmonella enterica	42
Apis mellifera	42
Acromyrmex echinatior	42
Cebus capucinus imitator	42
Pinctada fucata	41
Plasmodium ovale wallikeri	41
Octomeris brunnea	41
Trypanosoma cruzi	41
Equus asinus	41
Capra hircus	41
Streptomyces sp. TverLS-915	41
Cyprinodon variegatus	41
Drosophila takahashii	40
Haemonchus contortus	40
Setaria italica	40
Kytococcus sp. CUA-901	40
Polaribacter haliotis	40
Dictyostelium discoideum AX4	39
Fusconaia flava	39
Apis florea	39
Mustela putorius furo	39
Stegastes partitus	39
Atta colombica	39
Diuraphis noxia	39
Protobothrops mucrosquamatus	39
Hanseniaspora osmophila	39
Trachymyrmex septentrionalis	38
Nanorana parkeri	38
Streptomyces sp. AA0539	38
Gekko japonicus	38
Sorghum bicolor	38
Caenorhabditis briggsae	38
Sporothrix schenckii 1099-18	38
Mandrillus leucophaeus	38
Numida meleagris	38
Rana catesbeiana	38
Pyganodon grandis	38
Mycobacterium kansasii	38
Seriola dumerili	37
Fistulobalanus albicostatus	37
Peromyscus maniculatus bairdii	37
Tupaia chinensis	37
Sarcophilus harrisii	37
Bacillus aryabhattai B8W22	37
Aegilops tauschii subsp. tauschii	37
Schistosoma mansoni	37
Bactrocera dorsalis	37
Drosophila arizonae	37
Ichthyophthirius multifiliis	37
Paramecium tetraurelia strain d4-2	36
Fabibacter sp. 4D4	36
Mastacembelus armatus	36
Streptomyces barkulensis	36
Herrania umbratica	36
Clonorchis sinensis	36
Trichophyton verrucosum HKI 0517	36
Cellulosimicrobium sp. MM	36
Apis cerana	36
Actinosynnema mirum	36
Neocallimastix californiae	36
Trichophyton benhamiae CBS 112371	36
Plasmodium gonderi	36
Paramecium tetraurelia	36
Drosophila busckii	36
Varroa destructor	36
Drosophila eugracilis	36
Burkholderia multivorans	35
Apis dorsata	35
Maylandia zebra	35
Alligator mississippiensis	35
Clostridium butyricum	35
Sinocyclocheilus rhinocerous	35
Penaeus vannamei	35
Quadrula pustulosa	34
Bactrocera latifrons	34
Streptosporangium subroseum	34
Drosophila bipectinata	34
Jaculus jaculus	34
Drosophila rhopaloa	34
Drosophila biarmipes	34
Mortierella elongata AG-77	34
Mytilus coruscus	34
Brugia malayi	34
Microtus ochrogaster	34
Microsporum canis CBS 113480	34
Toxoplasma gondii TgCatPRC2	34
Streptococcus sanguinis	33
Streptomyces sp. Mg1	33
Burkholderia pseudomallei MSHR4303	33
Microcebus murinus	33
Cellulosimicrobium cellulans	33
Unio pictorum	33
Catenaria anguillulae PL171	33
Lampsilis cardium	33
Streptomyces sp. SPB78	32
Drosophila miranda	32
Tsuchiyaea wingfieldii CBS 7118	32
bacterium	32
Vicugna pacos	32
Chinchilla lanigera	32
Apodemus agrarius	32
Paenibacillus tyrfis	32
Trichinella nativa	32
Saimiri boliviensis boliviensis	32
Pogonomyrmex barbatus	32
Cryptosporidium parvum	32
Thecamonas trahens ATCC 50062	32
Acanthamoeba castellanii str. Neff	31
Phanerochaete carnosa HHB-10118-sp	31
Cyclospora cayetanensis	31
Otolemur garnettii	31
Saccharomyces cerevisiae S288C	31
Burkholderia thailandensis	31
Jiangella alba	31
Brachidontes exustus	31
Castor canadensis	31
Hymenolepis microstoma	30
Kryptolebias marmoratus	30
Perna canaliculus	30
Rosa chinensis	30
Meriones unguiculatus	30
Pseudomicrostroma glucosiphilum	30
Loa loa	30
Lepas pectinata	30
Amphiprion ocellaris	30
Anopheles arabiensis	30
Myzus persicae	30
Leptonychotes weddellii	30
Apis cerana cerana	30
Lates calcarifer	29
Acanthochromis polyacanthus	29
Cupriavidus taiwanensis	29
Klebsiella pneumoniae	29
Penaeus japonicus	29
Burkholderia pseudomallei MSHR640	29
Anaeromyxobacter sp. Fw109-5	29
Kwoniella pini CBS 10737	29
Orycteropus afer afer	29
Potomida littoralis	29
Ramazzottius varieornatus	29
Plasmodium reichenowi	29
Octodon degus	29
Human betaherpesvirus 6A	29
Sporothrix brasiliensis 5110	29
Burkholderia mallei PRL-20	29
Penaeus monodon	29
Micromonospora sp. M42	29
Streptomyces odonnellii	28
Enterococcus	28
Burkholderia pseudomallei TSV 31	28
Rhincodon typus	28
Bacillus	28
Paenibacillus odorifer	28
Kitasatospora cheerisanensis	28
Trimeresurus stejnegeri	28
Penicillium roqueforti FM164	28
Streptococcus oralis subsp. dentisani	28
Bacillus sp. 103mf	27
Oenococcus oeni	27
Papilio polytes	27
Fukomys damarensis	27
Capsicum annuum	27
Orcinus orca	27
Lepisosteus oculatus	27
Tetrahymena thermophila SB210	27
Chrysochloris asiatica	27
Pseudanabaena sp. PCC 6802	27
Operophtera brumata	27
Calypte anna	27
Actinomadura parvosata subsp. kistnae	27
Trichinella pseudospiralis	27
Coturnix japonica	26
Streptomyces megasporus	26
Pygocentrus nattereri	26
Toxoplasma gondii	26
Ptilinopus occipitalis	26
Streptomyces viridosporus ATCC 14672	26
Acytostelium subglobosum LB1	26
Drosophila suzukii	26
Tilletiopsis washingtonensis	26
Rhodococcus ruber	26
Hyriopsis cumingii	26
Toxoplasma gondii VEG	26
Aspergillus niger	26
Rhodospirillales bacterium URHD0017	26
Ptilinopus richardsii	26
Ptilinopus rarotongensis	26
Scophthalmus maximus	26
Neisseria meningitidis	26
Chrysemys picta bellii	26
Poecilia mexicana	26
Trichomalopsis sarcophagae	26
Peromyscus maniculatus	26
Gonium pectorale	26
Burkholderia sp. BDU5	26
Ostreococcus tauri	26
Dictyostelium purpureum	26
Poecilia formosa	26
Haemophilus influenzae	25
Sphaeroforma arctica JP610	25
Leporid alphaherpesvirus 4	25
Deinagkistrodon acutus	25
Actinoplanes atraurantiacus	25
Burkholderia pseudomallei MSHR7498	25
Mycobacterium haemophilum	25
Rhodotorula toruloides	25
Cavenderia fasciculata	25
Chlorostilbon poortmani	25
Streptomyces hygroscopicus	25
Scylla paramamosain	25
Piromyces sp. E2	24
Caulochytrium protostelioides	24
Ideonella sakaiensis	24
Ovis aries musimon	24
Sarcoptes scabiei	24
Aspergillus fumigatus	24
Ralstonia solanacearum	24
Jiangella muralis	24
Thalassiosira oceanica	24
Odocoileus virginianus texanus	24
Haplochromis burtoni	24
Bactrocera oleae	24
Ancylostoma duodenale	24
Smittium culicis	23
Bacillus cereus ATCC 10987	23
Oryza sativa Indica Group	23
Pseudonocardia autotrophica	23
Amycolatopsis vancoresmycina DSM 44592	23
Asanoa ferruginea	23
Kineosporiales bacterium YIM 75000	23
Sporothrix insectorum RCEF 264	23
Hypholoma sublateritium FD-334 SS-4	23
Cristaria plicata	23
Labrus bergylta	23
Microbispora sp. GKU 823	23
Heterostelium album PN500	23
Phragmatopoma caudata	23
Burkholderia pseudomallei MSHR435	23
Sorangium cellulosum So0157-2	23
Nannizzia gypsea CBS 118893	23
Trichinella nelsoni	23
Pelodiscus sinensis	23
Rana blairi	23
Punica granatum	23
Chenopodium quinoa	23
Fonticula alba	23
Dipodomys ordii	22
Listeria monocytogenes	22
Odobenus rosmarus divergens	22
Seriola lalandi dorsalis	22
Pantholops hodgsonii	22
Carlito syrichta	22
Trichoplax sp. H2	22
Rhodotorula taiwanensis	22
Myxococcus xanthus	22
Trichinella zimbabwensis	22
Plasmodium falciparum 3D7	22
Elephantulus edwardii	22
Plasmodium falciparum NF54	22
Toxocara canis	22
Sphaeroforma tapetis	22
Aspergillus wentii DTO 134E9	22
Toxoplasma gondii COUG	22
Bacillus subtilis	22
Neolamprologus brichardi	22
Paenibacillus xerothermodurans	22
Phytophthora sojae	22
Notechis scutatus	21
Homarus americanus	21
Lactobacillus reuteri	21
Burkholderia cenocepacia PC184	21
Beihai barnacle viurs 1	21
Bacillus velezensis	21
Bacillus megaterium DSM 319	21
Cynoglossus semilaevis	21
Microdochium bolleyi	21
Blastocystis sp. ATCC 50177/Nand II	21
Bacillus cereus	21
Trichechus manatus latirostris	21
Pteropus alecto	21
Cryptococcus amylolentus CBS 6039	21
Hammondia hammondi	21
Diploscapter pachys	21
Chaetura pelagica	21
Nonomuraea gerenzanensis	21
Plasmodium cynomolgi strain B	21
Burkholderia vietnamiensis	21
Plasmodium sp. DRC-Itaito	21
Nannospalax galili	21
Myotis brandtii	21
Myotis davidii	20
Schmidtea mediterranea	20
Schizosaccharomyces pombe	20
Pseudomonas	20
Polyclinum madrasensis	20
Cryptosporangium aurantiacum	20
Haloferax elongans	20
Rattus sp.	20
Mus sp.	20
Plasmodiophora brassicae	20
Haloferax prahovense	20
Pseudonocardia sp. CNS-004	20
Pseudopodoces humilis	20
Pseudonocardia sp. Ae263_Ps1	20
Haloferax sp. SB3	20
Zygosaccharomyces parabailii	20
Coccidioides posadasii C735 delta SOWgp	20
Trichinella sp. T8	20
Haloferax	19
Cryptosporidium parvum Iowa II	19
Nocardiopsis salina	19
Haloferax larsenii	19
Ceratotherium simum simum	19
Actinomadura hibisca	19
Brachycentrus americanus	19
Solirubrobacterales bacterium URHD0059	19
Rousettus aegyptiacus	19
Dreissena polymorpha	19
Gekko gecko	19
Calidris pusilla	19
Oceanicola granulosus HTCC2516	19
Micromonospora sediminicola	19
Acinetobacter baumannii	19
Streptomyces sp. DfronAA-171	19
Manis javanica	19
Allomyces macrogynus ATCC 38327	19
Lipotes vexillifer	19
Lentzea guizhouensis	19
Glycine max	19
Anas platyrhynchos	19
Caenorhabditis sinica	18
Bacillus sp. IHB B 7164	18
Epioblasma torulosa rangiana	18
Aspergillus fumigatus Af293	18
Elliptio icterina	18
Kwoniella heveanensis CBS 569	18
Ostreococcus lucimarinus CCE9901	18
Mycobacterium haemophilum DSM 44634	18
Human betaherpesvirus 6	18
Haliangium ochraceum	18
Serendipita vermifera 'subsp. bescii'	18
Monopterus albus	18
Anaeromyces robustus	18
Sorex araneus	18
Trichoderma reesei QM6a	18
Mycobacterium tuberculosis variant bovis	18
Caenorhabditis latens	18
Lactobacillus fermentum	18
Tinamus guttatus	18
Gavialis gangeticus	18
Burkholderia pseudomallei MSHR449	18
Atthis heloisa	18
Anopheles quadriannulatus	18
Monodonta turbinata, gonads, Peptide, 106 aa	18
Human gammaherpesvirus 4	18
Dichanthelium oligosanthes	18
Samia ricini	18
Aureobasidium subglaciale EXF-2481	18
Plasmodium sp. gorilla clade G3	18
Saccharomyces cerevisiae CEN.PK113-7D	18
Lepeophtheirus salmonis	18
Ictidomys tridecemlineatus	18
Ficedula albicollis	18
Verrucomicrobia bacterium	18
Echinococcus multilocularis	18
Micromonospora noduli	18
Frankia sp. QA3	18
Candidatus Sulfopaludibacter sp. SbA3	17
Cellulomonas sp. FA1	17
Macrophomina phaseolina MS6	17
Rhinolophus sinicus	17
Clavispora lusitaniae ATCC 42720	17
Pseudonocardia sp. Ae150A_Ps1	17
Rhizobiales bacterium	17
Burkholderia seminalis	17
Phytophthora parasitica	17
Physeter catodon	17
Streptomyces gancidicus BKS 13-15	17
Tolypothrix campylonemoides VB511288	17
Amborella trichopoda	17
Ursus arctos horribilis	17
Manduca sexta	17
Pseudonocardia sp. Ae168_Ps1	17
Pseudonocardia sp. Ae356_Ps1	17
Bacillus camelliae	17
Caenorhabditis nigoni	17
Amazona aestiva	17
Urocitellus parryii	17
Propithecus coquereli	17
Bombyx mori nucleopolyhedrovirus	17
Phytophthora infestans T30-4	17
Gymnopus luxurians FD-317 M1	17
Frankia sp. CcI49	17
Euroglyphus maynei	16
Geodermatophilus normandii	16
Asanoa hainanensis	16
Gammaproteobacteria bacterium 2W06	16
Megabalanus rosa	16
Streptococcus pyogenes	16
Notothenia coriiceps	16
Streptomyces sp. 1	16
Sphaerotilus natans	16
Oncorhynchus keta	16
Bacillus sp. Leaf75	16
Lactobacillus	16
Streptomyces sp. W007	16
Burkholderia mallei ATCC 23344	16
Streptomyces sp. e14	16
Exophiala xenobiotica	16
Syncephalastrum racemosum	16
Mycobacterium marinum	16
Rhizophagus irregularis DAOM 181602=DAOM 197198	16
Calliphlox lyrura	16
Bordetella parapertussis	16
Pundamilia nyererei	16
Euleptes europaea	16
Aphanomyces astaci	16
Myotis lucifugus	16
Bradyrhizobium erythrophlei	16
Cervus elaphus hippelaphus	16
Salinispora pacifica	16
Actinoplanes missouriensis 431	16
Terrapene mexicana triunguis	16
Poecilia reticulata	16
Atta cephalotes	16
Actinoplanes subtropicus	16
Clostridium botulinum	16
Lactobacillus rhamnosus	16
Cynara cardunculus var. scolymus	16
Cucumis sativus	16
Actinokineospora spheciospongiae	16
Aspergillus flavus	16
Gracilariopsis chorda	16
Plasmodium yoelii yoelii	15
Echinops telfairi	15
Streptococcus mitis	15
Parus major	15
Streptomyces albulus	15
Cyphia angustiloba	15
Callorhinus ursinus	15
Rattus tanezumi	15
Trichinella murrelli	15
Burkholderia pseudomallei TSV 48	15
Toxoplasma gondii ARI	15
Actinomadura atramentaria	15
Toxoplasma gondii MAS	15
Egretta garzetta	15
Caligus rogercresseyi	15
Kandleria vitulina DSM 20405	15
Pilsbryoconcha exilis	15
Antheraea pernyi	15
Cyanistes caeruleus	15
Saccharomyces cerevisiae YJM789	15
Bacillus thuringiensis	15
Burkholderia pseudomallei MSHR733	15
Burkholderia pseudomallei Pakistan 9	15
Bacillus sp. 71mf	15
Anopheles bwambae	15
Cuculus canorus	15
Phascolarctos cinereus	15
Burkholderia pseudomallei MSHR456	15
Bacillus sp. RC	15
Smittium angustum	15
Ananas comosus	15
Burkholderia pseudomallei MSHR332	15
Enterobacteriaceae	15
Thalassiosira pseudonana CCMP1335	15
Zancudomyces culisetae	15
Ophiophagus hannah	15
Actinomadura	15
Bordetella parapertussis Bpp5	15
Stylonychia lemnae	15
Micromonas commoda	15
Tachypleus tridentatus	15
Blastocystis hominis	15
Saccharothrix espanaensis DSM 44229	15
Helicoverpa armigera nucleopolyhedrovirus	15
Poecilia latipinna	15
Mycobacterium canettii CIPT 140070008	14
Beta vulgaris subsp. vulgaris	14
Stigmatella aurantiaca DW4/3-1	14
Yarrowia lipolytica	14
Camelus ferus	14
Cryptococcus neoformans var. neoformans JEC21	14
Calliphlox mitchellii	14
Kitasatospora phosalacinea	14
Elliptio waccamawensis	14
Anaeromyxobacter dehalogenans	14
Exidia glandulosa HHB12029	14
Mellisuga minima	14
Aspergillus fumigatus A1163	14
Haemophilus parahaemolyticus	14
Ricinus communis	14
Beauveria bassiana	14
Streptomyces sp. 4121.5	14
Lachancea dasiensis CBS 10888	14
Ceratopogonidae sp. sc_05751	14
Burkholderia thailandensis MSMB43	14
Actinoplanes sp. SE50/110	14
Colletotrichum incanum	14
Riptortus pedestris	14
Aspergillus oryzae	14
Caligus clemensi	14
Cyprogenia aberti	14
Amazilia tzacatl	14
Penicillium expansum	14
Panthera pardus	14
Bacillus sp. FJAT-21351	14
Dicentrarchus labrax	14
Sacculina yatsui	14
Streptomyces alboflavus	14
Gloydius halys	14
Anopheles coluzzii	14
Patagioenas fasciata monilis	14
Comamonadaceae bacterium YIM 73032	14
Ceratopogonidae sp. sc_01354	14
Chondromyces apiculatus DSM 436	14
Linderina pennispora	14
Enterococcus faecalis V583	14
Chionis albus	14
Trichinella patagoniensis	14
Exophiala oligosperma	14
Bacillus sp. Root147	14
Eulampis holosericeus	14
Burkholderia mallei GB8 horse 4	14
Calliphlox evelynae evelynae	14
Anopheles merus	14
Trichophyton rubrum	14
Neotoma lepida	14
Burkholderia sp. BDU6	14
Streptomyces sp. SolWspMP-sol7th	14
Purpureocillium lilacinum	14
Heliomaster furcifer	14
Lactobacillus pentosus	14
Echinococcus granulosus	14
Thauera sp. K11	14
Selasphorus scintilla	14
Burkholderia thailandensis E264	14
Trichophyton tonsurans CBS 112818	13
Ipomoea nil	13
Helicobacter pylori	13
Micromonospora aurantiaca	13
Marmota marmota marmota	13
Myxococcus hansupus	13
Enterococcus faecalis TX1346	13
Gambusia affinis	13
Nothoprocta perdicaria	13
Schizophyllum commune H4-8	13
Aspergillus fumigatus Z5	13
Physcomitrella patens	13
Trichoderma harzianum	13
Asparagus officinalis	13
Trichophyton equinum CBS 127.97	13
Balaenoptera acutorostrata scammoni	13
Cenococcum geophilum 1.58	13
Neurospora crassa	13
Austrominius modestus	13
Toxoplasma gondii p89	13
Toxoplasma gondii GAB2-2007-GAL-DOM2	13
Stentor coeruleus	13
Bombyx mandarina	13
Dactylosporangium aurantiacum	13
Puma concolor	13
Oidiodendron maius Zn	13
Paenibacillus sabinae	13
Burkholderia pseudomallei S13	13
Natrialba magadii ATCC 43099	13
Saccharomyces cerevisiae YJM1356	13
Haliangium ochraceum DSM 14365	13
Lactobacillus paracasei	13
Halopelagius longus	13
Schistosoma haematobium	13
Streptomyces cattleya NRRL 8057 = DSM 46488	13
Campylobacter lari	13
Bothrops jararaca	13
Dreissena presbensis	13
Aspergillus fischeri NRRL 181	13
Canine morbillivirus	13
Piromyces finnis	13
Cystoisospora suis	13
Papaver somniferum	13
Locusta migratoria	13
Massilia glaciei	13
Babesia gibsoni	13
Enterococcus faecalis EnGen0411	13
Galleria mellonella	13
Curtobacterium	13
Plasmodium sp. gorilla clade G1	13
Planoprotostelium fungivorum	13
Streptomyces scabiei	13
Natrialba magadii	13
Nannochloropsis gaditana	13
Streptomyces cyaneogriseus	12
Vaccinia virus	12
Toxoplasma gondii ME49	12
Saltwater crocodilepox virus	12
Mycobacterium xenopi 3993	12
Enterococcus faecalis TUSoD Ef11	12
Gemmata sp. SH-PL17	12
Herbidospora cretacea	12
Planorbella duryi	12
Dreissena blanci	12
Coccidioides posadasii str. Silveira	12
Burkholderia pseudomallei MSHR5569	12
Cancer borealis	12
Ruminococcus flavefaciens	12
Kutzneria sp. 744	12
Lactobacillus casei	12
Struthio camelus australis	12
Pseudonocardia sp. SCN 72-86	12
Saccharomyces cerevisiae YJM1078	12
Plantactinospora sp. KBS50	12
Mallada signata	12
Plesiocystis pacifica SIR-1	12
Saccharopolyspora erythraea D	12
Alligator sinensis	12
Python bivittatus	12
Micrococcus luteus	12
Valsa mali var. pyri	12
Aspergillus flavus NRRL3357	12
Saccharomyces cerevisiae YJM1129	12
Megabalanus volcano	12
Guillardia theta CCMP2712	12
Mycobacterium	12
Burkholderia pseudomallei MSHR7334	12
Burkholderia pseudomallei MSHR7343	12
Saccharomyces cerevisiae YJM1386	12
Mycobacterium xenopi 4042	12
Toxoplasma gondii FOU	12
Ganoderma sinense ZZ0214-1	12
Verticillium longisporum	12
Enterococcus faecalis ATCC 19433	12
Zygosaccharomyces bailii ISA1307	12
Actinomycetospora chiangmaiensis	12
Saccharomyces cerevisiae YJM1526	12
Methylibium sp. YR605	12
Saccharomyces cerevisiae YJM1573	12
Enterococcus faecalis 62	12
1,2-a	12
Saccharopolyspora erythraea NRRL 2338	12
Triticum aestivum	12
Limosa lapponica baueri	12
Aureispira sp. CCB-QB1	12
Plastid transformation vector pAPR21	12
Uliginosibacterium sp. TH139	12
Manacus vitellinus	12
Camelus dromedarius	12
Magnaporthe oryzae Y34	12
Trichoderma gamsii	12
Paenibacillus sp. FSL R7-0331	12
Plasmodium ovale	12
Porphyromonas gingivalis	12
Stereum hirsutum FP-91666 SS1	12
Toxoplasma gondii RUB	12
Chlamydomonas eustigma	12
Ochotona princeps	12
Patulibacter americanus	12
Enterococcus faecalis str. Symbioflor 1	12
Enterococcus faecium PC4.1	12
Plasmodium berghei	12
Fibularhizoctonia sp. CBS 109695	12
Mycolicibacterium smegmatis MC2 155	12
Solanum lycopersicum	12
Enterococcus faecalis EnGen0234	12
Rhizophagus irregularis	12
Hemiphyllodactylus titiwangsaensis	12
Cellulomonas sp. HZM	12
Azoarcus sp. BH72	12
Methanocella arvoryzae MRE50	12
Streptomyces albus	12
Protobothrops flavoviridis	12
Toxoplasma gondii VAND	12
Reticulomyxa filosa	12
Panthera tigris altaica	12
Magnaporthe oryzae 70-15	12
Oxytricha trifallax	12
Saccharopolyspora erythraea	12
Burkholderia pseudomallei ABCPW 107	12
Hypsiboas albopunctatus	11
Lechevalieria aerocolonigenes	11
Trypanosoma grayi	11
Stenotrophomonas maltophilia	11
Bacillus mycoides	11
Trichophyton rubrum MR850	11
Burkholderia	11
Micromonospora sp. NGC1-4	11
Aureobasidium pullulans	11
Medicago truncatula	11
Burkholderia pseudomallei 1710a	11
Lysinimicrobium aestuarii	11
Trichinella britovi	11
Rhodococcus sp. EsD8	11
Cellulomonas gilvus	11
Kitasatospora setae	11
Rothia mucilaginosa	11
Dactylellina haptotyla CBS 200.50	11
Trichophyton tonsurans	11
Corvus brachyrhynchos	11
Bacillus koreensis	11
Euperipatoides kanangrensis	11
Chlamydia trachomatis	11
Condylura cristata	11
Phytophthora cactorum	11
Clostridioides difficile	11
Saccharomyces cerevisiae YJM1417	11
Saccharomyces cerevisiae YJM1402	11
Methanococcus maripaludis	11
Saccharomyces cerevisiae YJM1307	11
Saccharomyces cerevisiae YJM1341	11
Saccharomyces cerevisiae YJM1342	11
Saccharomyces cerevisiae YJM1336	11
Enterococcus faecalis TX2141	11
Nonlabens ulvanivorans	11
Saccharomyces cerevisiae YJM681	11
Actinoplanes italicus	11
Amycolatopsis saalfeldensis	11
Frankia irregularis	11
Saccharomyces cerevisiae YJM627	11
Toxoplasma gondii GT1	11
Saccharomyces cerevisiae YJM555	11
Lepidothrix coronata	11
Mycobacterium tuberculosis variant bovis BCG str. ATCC 35743	11
Acanthisitta chloris	11
Sturnus vulgaris	11
Phlebiopsis gigantea 11061_1 CR5-6	11
Colius striatus	11
Trichophyton rubrum CBS 118892	11
Jatrophihabitans endophyticus	11
Trichomonas vaginalis G3	11
Aptenodytes forsteri	11
Shigella sonnei	11
Coccomyxa subellipsoidea C-169	11
Falco peregrinus	11
Enterococcus faecalis EnGen0409	11
Margaritifera falcata	11
Necator americanus	11
Bacillus sp. 171095_106	11
Cellvibrio sp. 79	11
Corvus cornix cornix	11
Enterococcus faecalis EnGen0233	11
Plasmodium falciparum IGH-CR14	11
Batrachochytrium salamandrivorans	11
Streptomyces griseus	11
2-methyl-3-(2- Oxopyrrolidin-1-yl)benzenesulfonylamino]-3-(4-methylpiperazin-1- Yl)- 3-oxopropyl	11
Pseudonocardia	11
Trichophyton rubrum CBS 100081	11
Cyphia banksiana	11
Enterococcus faecalis EnGen0066	11
Gasterosteus aculeatus	11
Streptomyces sp. Tu6071	11
Penaeus chinensis	11
Frankia sp. R43	11
Drechmeria coniospora	11
Burkholderia multivorans CGD1	11
Shewanella baltica	11
Macrovipera lebetina	11
Mesitornis unicolor	11
Zonotrichia albicollis	11
Solirubrobacter sp. URHD0082	11
Serratia marcescens	11
Mycobacterium canettii CIPT 140070010	10
Hyriopsis schlegelii	10
Nonlabens dokdonensis	10
Trichophyton rubrum CBS 289.86	10
Scopus umbretta	10
Bunopus tuberculatus	10
Yersinia pestis	10
Tursiops truncatus	10
Pseudonocardia sp. Ae505_Ps2	10
Amblema plicata	10
Latrodectus geometricus	10
Natronoarchaeum philippinense	10
Ophiocordyceps sinensis CO18	10
Pseudoferania polylepis	10
Ecitomorpha arachnoides	10
Geospiza fortis	10
Trichophyton benhamiae	10
Burkholderia pseudomallei TSV28	10
Actinokineospora bangkokensis	10
Plasmodium vivax North Korean	10
Roseivirga seohaensis	10
Streptomyces scabrisporus	10
Mycolicibacterium smegmatis	10
Tritrichomonas foetus	10
Chelydra serpentina	10
Paracyclopina nana	10
Methylobacterium aquaticum	10
Torulaspora delbrueckii	10
Clostridium perfringens	10
Aspergillus nidulans FGSC A4	10
Polaribacter reichenbachii	10
Nestor notabilis	10
Saccharomyces cerevisiae YJM1242	10
Saccharomyces cerevisiae YJM1248	10
Plasmodium knowlesi	10
Enterococcus faecium TX1330	10
Wolfiporia cocos MD-104 SS10	10
Trichophyton rubrum CBS 202.88	10
Saccharomyces cerevisiae YJM1477	10
Saccharomyces cerevisiae YJM1479	10
Lampsilis radiata radiata	10
Tolypocladium capitatum	10
Trichinella papuae	10
Burkholderia pseudomallei MSHR684	10
Saccharomyces cerevisiae YJM1400	10
Saccharomyces cerevisiae YJM1439	10
Anser cygnoides domesticus	10
Lacerta media wolterstorffi	10
Anopheles stephensi	10
Saccharomyces cerevisiae YJM1326	10
Aspergillus oryzae 3.042	10
Spisula solidissima	10
Saprolegnia parasitica CBS 223.65	10
Plasmodium fragile	10
Saccharomyces cerevisiae YJM693	10
Nocardia terpenica	10
Aspergillus niger ATCC 13496	10
Salmonella enterica subsp. enterica	10
Miniopterus natalensis	10
Fasciola hepatica	10
Erysiphe necator	10
Hipposideros armiger	10
Pelophylax ridibundus	10
Miniimonas sp. PCH200	10
Podospora anserina S mat+	10
Sistotremastrum suecicum HHB10207 ss-3	10
Daucus carota	10
Kwoniella dejecticola CBS 10117	10
Vigna angularis var. angularis	10
Loxosceles intermedia	10
Absidia glauca	10
Saccharomyces cerevisiae R103	10
Human alphaherpesvirus 2	10
Nocardia brasiliensis	10
Saitoella complicata NRRL Y-17804	10
Pseudomonas fluorescens	10
Mythimna unipuncta nucleopolyhedrovirus	10
Stenodactylus sthenodactylus	10
Aspergillus oryzae RIB40	10
Fusarium fujikuroi	10
Pisum sativum	10
Sulfolobus islandicus	10
Theileria annulata	10
Macrobrachium nipponense	10
Curtobacterium sp. ER1/6	10
Haloferax sp. Q22	10
Penicilliopsis zonata CBS 506.65	10
Orf virus	10
Trichophyton rubrum D6	10
Actinoalloteichus hoggarensis	10
Sinorhizobium sp. CCBAU 05631	10
Polaribacter sp. KT25b	10
Paraburkholderia fungorum	10
Polaribacter sp. ALD11	10
Cryptosporidium tyzzeri	10
Hepialus californicus	10
Phanerochaete chrysosporium	10
Neophocaena asiaeorientalis asiaeorientalis	10
Nipponia nippon	10
Enterococcus faecalis EnGen0208	10
Colletotrichum higginsianum	10
Goggia lineata	10
Opisthorchis viverrini	10
Acinonyx jubatus	10
Xiangella phaseoli	10
Buceros rhinoceros silvestris	10
Petromyzon marinus	10
Bacteroidetes bacterium	10
Burkholderia pseudomallei MSHR3709	10
Agrococcus pavilionensis	10
Mus spretus	10
Cryptosporidium hominis	10
Trichinella sp. T6	10
Trichinella sp. T9	10
Micromonospora chokoriensis	10
Burkholderiales bacterium	10
Amblyomma variegatum	10
Micromonospora saelicesensis	10
Mycobacterium avium subsp. avium 2285 (R)	10
Azorhizobium doebereinerae	10
Streptomyces sp. DconLS	10
Pterocles gutturalis	10
(1-Methyl-3- Phenylpropyl)amino]-2-Pyridinyl]oxy	10
Macrobrachium rosenbergii	10
Frankia canadensis	9
Burkholderia thailandensis USAMRU Malaysia #20	9
Nocardioides solisilvae	9
Bathymodiolus sp. RCV-2003	9
Lacerta agilis	9
Camelina sativa	9
Micractinium conductrix	9
Trichophyton soudanense CBS 452.61	9
Archangium gephyra	9
Plasmodium falciparum HB3	9
Geodermatophilus sabuli	9
Bothriocyrtum californicum	9
Plasmodium falciparum Dd2	9
Iberolacerta monticola	9
Staphylococcus pseudintermedius	9
Polaribacter vadi	9
Streptococcus suis	9
Mytella charruana	9
Actinoplanes sp. N902-109	9
Xylella fastidiosa	9
Picoides pubescens	9
Lacerta schreiberi	9
Crocodylus porosus	9
Eucalyptus grandis	9
Plasmodium knowlesi strain H	9
Lacerta bilineata bilineata	9
Gloydius brevicaudus	9
uncultured archaeon A07HR67	9
Lacerta trilineata trilineata	9
Nocardioides lianchengensis	9
Mycobacterium kansasii 732	9
Streptomyces armeniacus	9
Bacillus amyloliquefaciens	9
Aphanomyces invadans	9
Aquila chrysaetos canadensis	9
Tetrapisispora blattae CBS 6284	9
Enterococcus faecalis TX0411	9
Schistosoma japonicum	9
Streptomyces exfoliatus	9
Streptomyces yeochonensis	9
Streptomyces yokosukanensis	9
Saccharomyces cerevisiae YJM1083	9
Mytilopsis leucophaeata	9
Euzebya sp. DY32-46	9
Chthamalus proteus	9
Burkholderia stagnalis	9
Lacerta bilineata italica	9
Galactomyces candidus	9
Lacerta viridis meridionalis	9
Enterococcus faecium EnGen0047	9
Friedmanniella sagamiharensis	9
Trichophyton rubrum CBS 735.88	9
Crotalus atrox	9
Melanopsichium pennsylvanicum 4	9
Streptomyces sp. F-1	9
Leishmania braziliensis MHOM/BR/75/M2904	9
(Z)-2carboxy- 2-Methyl-1,3-Dioxane	9
Saccharomyces cerevisiae YJM244	9
Saccharomyces cerevisiae YJM270	9
Saccharomyces cerevisiae YJM271	9
Saccharomyces cerevisiae YJM1208	9
Saccharomyces cerevisiae YJM1133	9
Saccharomyces cerevisiae YJM1190	9
Lacerta viridis viridis	9
Xanthomonas citri pv. citri	9
Lacerta strigata	9
Helicoverpa zea	9
Saccharomyces cerevisiae YJM189	9
Saccharomyces cerevisiae YJM195	9
Saccharomyces cerevisiae YJM453	9
Saccharomyces cerevisiae YJM470	9
Saccharomyces cerevisiae YJM1415	9
Saccharomyces cerevisiae YJM1419	9
Saccharomyces cerevisiae YJM1450	9
Saccharomyces cerevisiae YJM1444	9
Saccharomyces cerevisiae YJM1447	9
Moesziomyces antarcticus	9
Saccharomyces cerevisiae YJM1355	9
Saccharomyces cerevisiae YJM1381	9
Saccharomyces cerevisiae YJM1385	9
Pteropus vampyrus	9
Camelus bactrianus	9
Trichophyton rubrum MR1448	9
Saccharomyces cerevisiae YJM326	9
Trichophyton rubrum MR1459	9
Saccharomyces cerevisiae YJM1311	9
Saccharomyces cerevisiae YJM1332	9
Enterococcus faecium Com12	9
Trichophyton equinum	9
Lacerta trilineata major	9
Saccharomyces cerevisiae YJM683	9
Saccharomyces cerevisiae YJM682	9
Melampsora larici-populina 98AG31	9
Aglaiocercus kingi	9
Aspergillus fumigatus var. RP-2014	9
Saccharomyces cerevisiae EC1118	9
Pseudonocardia dioxanivorans CB1190	9
Chlorella variabilis	9
Candida] glabrata	9
Saccharomyces cerevisiae YJM993	9
Enterococcus faecium 1,141,733	9
Sorangium cellulosum So ce56	9
Mesorhizobium loti	9
Charadrius vociferus	9
Enterococcus faecalis T8	9
Streptomyces rubrolavendulae	9
(z)-2-carboxy-2-methyl-1,3-dioxane	9
Cryptococcus neoformans var. neoformans B-3501A	9
Saccharothrix syringae	9
Lacerta trilineata polylepidota	9
Brassica napus	9
Lacerta viridis guentherpetersi	9
Gehyra cf. oceanica	9
Haloferax sp. Atlit-19N	9
Alicycliphilus sp. B1	9
Acheilognathus tabira tohokuensis	9
Oesophagostomum dentatum	9
Rhodococcus erythropolis	9
Candida] intermedia	9
Anodonta anatina	9
Pseudonocardia sp. Ae706_Ps2	9
Neurospora crassa OR74A	9
Polaribacter tangerinus	9
Solanum tuberosum	9
Araneus diadematus	9
Magnaporthe oryzae P131	9
Campylobacter jejuni	9
Colletotrichum tofieldiae	9
Deltaproteobacteria bacterium	9
Bathymodiolus puteoserpentis	9
Xenostrobus securis	9
Plasmodium sp. gorilla clade G2	9
Plasmodium vivax Brazil I	9
Simian torque teno virus	9
Enterococcus faecalis TX0645	9
Rhizobacter sp. OV335	9
Plesiocystis pacifica	9
Niviventer cremoriventer	9
Modiolus modiolus	9
Argiope trifasciata	9
Epinephelus coioides	9
Pseudomonas putida	9
Sulfolobus islandicus L.D.8.5	9
Lactobacillus paraplantarum	9
Artemia salina	9
Granulicella pectinivorans	9
Gaiella occulta	9
Pinctada margaritifera	9
Enterococcus faecalis EnGen0085	9
Pseudonaja textilis	9
Enterobacter cloacae	9
Micromonospora sp. ATCC 39149	9
Geodermatophilus obscurus	9
Plecturocebus moloch	9
Leishmania donovani	9
Lacerta trilineata hansschweizeri	9
Sclerotinia sclerotiorum 1980 UF-70	9
Mortierella verticillata NRRL 6337	9
Trichophyton verrucosum	9
Handroanthus impetiginosus	9
Lacerta pamphylica	9
(Z)-2carboxy-2-Methyl-1,3-Dioxane	9
Microbacterium sp. No. 7	9
Pasteurella multocida	9
Plasmopara halstedii	9
Rhodotorula sp. JG-1b	9
Eptesicus fuscus	9
Cariama cristata	9
Xanthomonas phaseoli pv. phaseoli	8
Aulacorhynchus caeruleogularis caeruleogularis	8
Pteroglossus castanotis australis	8
Herbidospora sakaeratensis	8
Bradyrhizobium lablabi	8
Acartia pacifica	8
Sphingomonas adhaesiva	8
Serendipita indica DSM 11827	8
Pollicipes polymerus	8
Xanthomonas oryzae pv. oryzae	8
Pteroglossus bitorquatus sturmii	8
Klebsiella oxytoca	8
Streptomyces zhaozhouensis	8
Acheilognathus tabira jordani	8
Aureobasidium pullulans EXF-150	8
Dickeya chrysanthemi	8
Streptomyces acidiscabies	8
Cellulomonas iranensis	8
Dendrobium catenatum	8
halophilic archaeon J07HB67	8
Lysinimicrobium luteum	8
Segniliparus rugosus ATCC BAA-974	8
Sulfolobus islandicus M.14.25	8
Saccharomyces paradoxus	8
Gavia stellata	8
Saccharomyces sp. 'boulardii'	8
Bordetella pertussis STO1-CHOC-0018	8
Plasmodium vivax India VII	8
Anodonta sp. KM-2009	8
Parageobacillus thermoglucosidasius	8
Streptosporangiaceae bacterium YIM 75507	8
Ixodes ricinus	8
Staphylococcus	8
Tauraco erythrolophus	8
Burkholderia pseudomallei TSV 43	8
Pteroglossus azara azara	8
Streptomyces sp. BoleA5	8
Burkholderia sp. H160	8
Sulfolobus islandicus Y.G.57.14	8
Polaribacter sp. SA4-12	8
Enterococcus faecium TX1337RF	8
Jannaschia rubra	8
Trichophyton interdigitale MR816	8
Streptomyces pristinaespiralis ATCC 25486	8
Kitasatospora griseola	8
Streptomyces paucisporeus	8
Daucus carota subsp. sativus	8
Kitasatospora sp. CB02891	8
Andigena laminirostris	8
Elasmodactylus tetensis	8
Sulfolobus islandicus M.16.27	8
Enterococcus faecium EnGen0003	8
Saccharomyces cerevisiae YJM1244	8
Saccharomyces cerevisiae YJM1250	8
Saccharomyces cerevisiae YJM1252	8
Saccharomyces cerevisiae YJM1273	8
Pteroglossus beauharnaesii	8
Pteroglossus castanotis castanotis	8
Trypanosoma theileri	8
Saccharomyces cerevisiae YJM248	8
Streptomyces sp. SPB074	8
Streptomyces cinnamoneus	8
Pteroglossus mariae	8
Aspergillus flavus AF70	8
Kitasatospora aureofaciens	8
Pteroglossus frantzii	8
Geodermatophilus sp. DSM 44208	8
Trypanosoma cruzi Dm28c	8
Pteroglossus bailloni	8
Pteroglossus torquatus	8
Streptomyces lividans 1326	8
Cellulosimicrobium sp. TH-20	8
Aulacorhynchus atrogularis atrogularis	8
Saccharomyces cerevisiae YJM450	8
Saccharomyces cerevisiae YJM451	8
Lupinus angustifolius	8
Saccharomyces cerevisiae YJM1418	8
Saccharomyces cerevisiae YJM1401	8
Piscicoccus intestinalis	8
Saccharomyces cerevisiae YJM1434	8
Meyerozyma guilliermondii ATCC 6260	8
Saccharomyces cerevisiae YJM1383	8
Saccharomyces cerevisiae YJM1387	8
Subtercola boreus	8
Saccharomyces cerevisiae YJM1399	8
Pteroglossus viridis	8
Halobacteriales archaeon SW_8_66_22	8
Andigena hypoglauca lateralis	8
Saccharomyces cerevisiae YJM1338	8
Trichophyton rubrum CBS 288.86	8
Schizophyllum commune	8
Elliptio fisheriana	8
Streptomyces viridochromogenes DSM 40736	8
Zygosaccharomyces bailii	8
pseudomallei group	8
Streptococcus equinus	8
Mycobacterium uberis	8
Melopsittacus undulatus	8
Pteroglossus azara flavirostris	8
Albizia julibrissin	8
Selaginella moellendorffii	8
Frankia sp. CpI1-P	8
Marssonina coronariae	8
Saccharomyces cerevisiae YJM984	8
Saccharomyces cerevisiae YJM987	8
Pteroglossus inscriptus inscriptus	8
Saccharomyces cerevisiae YJM972	8
Saccharomyces cerevisiae YJM978	8
Saccharomyces cerevisiae YJM969	8
Uncinocarpus reesii 1704	8
Saccharomyces cerevisiae YJM990	8
Saccharomyces cerevisiae YJM996	8
Kitasatospora sp. SolWspMP-SS2h	8
Cordyceps confragosa RCEF 1005	8
Nicotiana tabacum	8
Trichophyton mentagrophytes	8
Strongyloides ratti	8
Sporisorium reilianum SRZ2	8
Perca flavescens	8
Anodonta oregonensis	8
Actinomadura rifamycini	8
Selenidera gouldii	8
Bovine alphaherpesvirus 1	8
Gorilla gorilla	8
Roseomonas sp. CQN31	8
Desertimonas flava	8
Hypochilus thorelli	8
Streptomyces reticuli	8
Ursus maritimus	8
Clostridium sp. HMSC19A10	8
Dreissena rostriformis bugensis	8
Streptomyces afghaniensis 772	8
Pteroglossus inscriptus humboldti	8
Bacillus smithii 7_3_47FAA	8
Microsporum canis	8
Ramphastos ariel	8
Angustibacter sp. Root456	8
Selenidera spectabilis	8
Selenidera piperivora	8
Mastigocladus laminosus UU774	8
Actinocatenispora sera	8
Haemophilus pittmaniae	8
Plasmodium inui San Antonio 1	8
Aspergillus niger CBS 513.88	8
Conexibacter sp. Seoho-28	8
fungal sp. No.11243	8
Antheraea yamamai	8
Sulfolobus islandicus M.16.4	8
Sphaerulina musiva SO2202	8
Pteroglossus aracari aracari	8
Saurodactylus brosseti	8
Parastagonospora nodorum SN15	8
Aspergillus oryzae 100-8	8
Rothia mucilaginosa DY-18	8
Candida albicans	8
Saccharomyces cerevisiae RM11-1a	8
Halorubrum ezzemoulense	8
Gaeumannomyces tritici R3-111a-1	8
Phalacrocorax carbo	8
Lampsilis ornata	8
Aspergillus clavatus NRRL 1	8
Mycobacteriaceae	8
Sulfolobus islandicus L.S.2.15	8
Batrachochytrium dendrobatidis JAM81	8
Helicosporidium sp. ATCC 50920	8
Rhodotorula toruloides NP11	8
Cellulomonas marina	8
Saccharomyces cerevisiae P283	8
Pteroglossus bitorquatus reichenowi	8
Brachidontes adamsianus	8
Pteroglossus erythropygius	8
Cherax quadricarinatus	8
Enterococcus faecalis EnGen0333	8
Rattus rattus	8
Cryptococcus amylolentus CBS 6273	8
Enterococcus faecalis EnGen0354	8
Frankia sp. BMG5.36	8
Enterococcus faecalis EnGen0328	8
Saccharomyces cerevisiae P301	8
Lechevalieria fradiae	8
Pyrenophora tritici-repentis	8
Andigena nigrirostris spilorhynchus	8
Nocardiopsis trehalosi	8
Ovis sp.	8
Mycobacterium tuberculosis RGTB423	8
Nocardia seriolae	8
Lichtheimia ramosa	8
Pteroglossus sanguineus	8
Fragilariopsis cylindrus CCMP1102	8
Bacillus sp. LF1	8
Phaseolus vulgaris	8
Clostridium	8
Neonectria ditissima	8
Apaloderma vittatum	8
Arabidopsis lyrata subsp. petraea	8
Andigena hypoglauca hypoglauca	8
Aspergillus brunneoviolaceus CBS 621.78	8
Saturnia boisduvalii	8
Arabidopsis lyrata subsp. lyrata	8
Burkholderia pseudomallei MSHR3960	8
Corynebacterium epidermidicanis	8
Bordetella bronchiseptica KM22	8
Halarchaeum acidiphilum MH1-52-1	8
Phytophthora parasitica CJ01A1	8
Pteroglossus pluricinctus	8
Salmonella enterica subsp. enterica serovar Typhimurium	7
Escherichia coli O177:NM str. 2010C-4558	7
Pyrobaculum neutrophilum V24Sta	7
Nocardia mexicana	7
Desulfitobacterium hafniense	7
Lysinimicrobium soli	7
Fistulifera solaris	7
Liphistius malayanus	7
Heterobasidion irregulare TC 32-1	7
Tieghemostelium lacteum	7
Mycobacterium tuberculosis UT0054	7
Anoplopoma fimbria	7
Leucobacter chromiiresistens	7
Pararhodospirillum photometricum DSM 122	7
Streptomyces specialis	7
bacterium 2013Ark19i	7
Candida viswanathii	7
Curtobacterium sp. Leaf183	7
Phytophthora parasitica INRA-310	7
Lichtheimia corymbifera JMRC:FSU:9682	7
Variovorax paradoxus	7
Oerskovia enterophila	7
Bacteria	7
Cryptococcus neoformans var. grubii	7
Fusarium verticillioides	7
Thielaviopsis punctulata	7
Streptomyces thermoautotrophicus	7
Colletotrichum sublineola	7
Streptococcus agalactiae H36B	7
Aspergillus phoenicis ATCC 13157	7
Patulibacter medicamentivorans	7
Campaea perlata	7
Streptomyces sp. C	7
Miniimonas sp. S16	7
Pachydactylus weberi	7
Rhodnius prolixus	7
Cordyceps militaris CM01	7
Nocardia amikacinitolerans	7
Streptomyces mirabilis	7
Colinus virginianus	7
Ceraceosorus guamensis	7
Sordaria macrospora	7
Enterococcus faecium SB2C-2	7
Saccharothrix variisporea	7
Coccidioides posadasii RMSCC 3488	7
Patulibacter minatonensis	7
Rhodeus ocellatus kurumeus	7
Enhygromyxa salina	7
Streptomyces sp. TLI_171	7
Aeromicrobium sp. Root472D3	7
Candidatus Magasanikbacteria bacterium CG10_big_fil_rev_8_21_14_0_10_42_10	7
Nocardioides sp. Leaf307	7
Streptomyces sp. Root66D1	7
Chlamydotis macqueenii	7
Conidiobolus coronatus NRRL 28638	7
Actinomyces odontolyticus	7
Nicotiana sylvestris	7
Escherichia coli 97.0246	7
Aureobasidium melanogenum CBS 110374	7
Lamprotula caveata	7
Chelonia mydas	7
Bothrops jararacussu	7
Microbacterium sp. KCTC 39802	7
Bacillus megaterium QM B1551	7
Gossypium hirsutum	7
Opisthocomus hoazin	7
Epicoccum nigrum	7
Papio hamadryas	7
Cerberus rynchops	7
Saccharomyces cerevisiae YJM1202	7
Phytophthora parasitica P10297	7
Trichoderma atroviride IMI 206040	7
Trichuris trichiura	7
Saccharomyces cerevisiae YJM1199	7
Capsicum chinense	7
Equid alphaherpesvirus 1	7
Burkholderia sp. AU4i	7
Nocardioides	7
Streptomyces sp. LcepLS	7
Kitasatospora sp. CB01950	7
Saccharomyces cerevisiae YJM541	7
Saccharomyces cerevisiae YJM456	7
Mycobacterium ulcerans str. Harvey	7
Arachis hypogaea	7
Rhodococcus sp. MTM3W5.2	7
Asanoa ishikariensis	7
Saccharomyces cerevisiae YJM1433	7
Escherichia coli O145:H25 str. 07-3858	7
Saccharomyces cerevisiae YJM1460	7
Saccharomyces cerevisiae YJM1463	7
Adelomyia melanogenys	7
Saccharomyces cerevisiae YJM1388	7
Laetiporus sulphureus 93-53	7
Azospirillum brasilense	7
Plasmodium falciparum Santa Lucia	7
Saccharomyces cerevisiae YJM428	7
Salmonella enterica subsp. enterica serovar Apapa str. SA20060561	7
Saccharomyces cerevisiae YJM320	7
Chloroflexi bacterium RBG_16_68_14	7
Saccharomyces cerevisiae YJM1304	7
Janibacter hoylei PVAS-1	7
Lactococcus lactis	7
Frankia saprophytica	7
Saccharomyces cerevisiae YJM689	7
Penicillium rubens Wisconsin 54-1255	7
Legionella pneumophila	7
Parageobacillus thermantarcticus	7
Trichophyton violaceum	7
Clavibacter insidiosus	7
Pelecanus crispus	7
Actinomycetospora cinnamomea	7
Lymantria dispar multiple nucleopolyhedrovirus	7
Saccharomyces cerevisiae YJM554	7
Actinomyces timonensis	7
Saccharomyces cerevisiae YJM1527	7
Saccharomyces cerevisiae YJM1549	7
Saccharomyces cerevisiae YJM1574	7
Trypanosoma cruzi strain CL Brener	7
Escherichia coli O145:H28 str. 2009C-3292	7
Kineosporia sp. R_H_3	7
Burkholderia pseudomallei MSHR2990	7
Streptomyces iranensis	7
Saccharomyces cerevisiae YJM981	7
Streptomyces katrae	7
Actinobacteria bacterium	7
Polaribacter sp. Hel_I_88	7
Daedalea quercina L-15889	7
Balneola vulgaris	7
Enterococcus faecalis T2	7
Aspergillus welwitschiae	7
Maxomys surifer	7
Dyella	7
Streptomyces purpureus	7
Rhodopseudomonas palustris	7
Cellvibrionaceae bacterium Bs12	7
Ophiocordyceps unilateralis	7
Falco cherrug	7
Dromaius novaehollandiae	7
Myxococcus xanthus DK 1622	7
Rhodopirellula baltica SH 1	7
Human mastadenovirus C	7
Gonapodya prolifera JEL478	7
Artemia sinica	7
Arachis ipaensis	7
Streptococcus oralis	7
Plicaturopsis crispa FD-325 SS-3	7
Fusarium oxysporum	7
Rhizopus microsporus var. microsporus	7
Bacteroides cellulosilyticus	7
Fusarium proliferatum	7
Pagrus major	7
Antheraea polyphemus	7
Mycobacterium intracellulare	7
Methylobrevis pamukkalensis	7
Streptomyces griseoflavus Tu4000	7
Nonomuraea jiangxiensis	7
Mycobacterium virus Che8	7
Clostridium butyricum E4 str. BoNT E BL5262	7
Streptomyces sp. 769	7
Candidatus Rokubacteria bacterium RBG_16_73_20	7
Chthamalus dalli	7
Torque teno virus 2	7
Rhodococcus	7
Streptomyces fradiae ATCC 10745 = DSM 40063	7
Jaminaea rosea	7
Anaeromyxobacter dehalogenans 2CP-1	7
Burkholderia pseudomallei NAU35A-3	7
Baudoinia panamericana UAMH 10762	7
Ophiostoma piceae UAMH 11346	7
Krasilnikoviella flava	7
Nocardia otitidiscaviarum	7
Clostridium sp. 3-3	7
Serratia	7
Tyto alba	7
Streptomyces globisporus	7
Spinacia oleracea	7
Ustilago maydis 521	7
Beauveria bassiana D1-5	7
Pseudogymnoascus destructans	7
Enterococcus faecalis EnGen0219	7
Enterococcus faecalis EnGen0225	7
Enterococcus faecalis EnGen0248	7
Enterococcus faecalis EnGen0242	7
Streptomyces mobaraensis NBRC 13819 = DSM 40847	7
Enterococcus faecalis EnGen0207	7
Acheilognathus tabira nakamurae	7
Plasmodium gallinaceum	7
Nocardia tenerifensis	7
Plasmodium falciparum UGT5.1	7
Burkholderia sp. BDU8	7
Tessaracoccus lapidicaptus	7
Streptomyces malaysiensis	7
Escherichia coli O165:H25 str. 2010C-4874	7
Enterococcus faecalis EnGen0338	7
Enterococcus faecalis EnGen0369	7
Enterococcus faecalis EnGen0366	7
Bacillus sp. SJS	7
Enterococcus faecalis EnGen0300	7
Anelloviridae sp.	7
Ornithodoros parkeri	7
Enterococcus faecalis EnGen0069	7
Clostridium butyricum 5521	7
Enterococcus faecalis EnGen0070	7
Enterococcus faecalis EnGen0088	7
Osmerus mordax	7
Uloborus diversus	7
Calocera cornea HHB12733	7
Roseivirga echinicomitans	7
Epioblasma capsaeformis	7
Mycobacterium avium subsp. paratuberculosis S5	7
Saudi moumouvirus	7
Chrysoperla carnea	7
Rhodopirellula baltica	7
Enterococcus faecalis EnGen0108	7
Enterococcus faecalis EnGen0106	7
Enterococcus faecalis EnGen0119	7
Enterococcus faecalis EnGen0110	7
Enterococcus faecalis EnGen0197	7
Enterococcus faecalis EnGen0096	7
Enterococcus faecalis EnGen0094	7
Enterococcus faecalis EnGen0092	7
Enterococcus faecalis EnGen0090	7
Plasmodium gaboni	7
Streptomyces sp. AmelKG-E11A	7
Exophiala spinifera	7
Enterococcus faecalis EnGen0310 = MMH594	7
Pseudonocardia dioxanivorans	7
Callipepla squamata	7
Haloferax massiliensis	7
Streptomyces sparsogenes	7
Brevibacillus laterosporus	7
Anthracocystis flocculosa PF-1	7
Colletotrichum fioriniae PJ7	7
Aspergillus nidulans	7
Neospora caninum	6
(1-aminoisoquinolin-6-yl)amino	6
Merops nubicus	6
(1- Aminoisoquinolin-6-yl)amino]-2-phenylacetyl}pyrrolidin-2-yl	6
Xanthomonas campestris	6
Burkholderia mallei NCTC 10247	6
Vigna radiata var. radiata	6
Glycomyces sp. NRRL B-16210	6
3-ethoxy-4-(propan-2-yloxy)phenyl	6
Xanthomonas translucens	6
Burkholderiaceae	6
(3,5-dimethyl-1,2-oxazol-4-yl)carbamoylamino]methyl]phenyl	6
Verticillium alfalfae VaMs.102	6
Bordetella bronchiseptica	6
14.2.2.1~6,10~]henicosa-1(18),6,8,10(21),16,19- Hexaen-7-yl	6
Hevea brasiliensis	6
Tilletia caries	6
Thamnophis sirtalis	6
Plasmodium vivax Mauritania I	6
Methylibium sp. T29-B	6
Neoromicia brunneus	6
Halocynthia roretzi	6
Lutzomyia longipalpis	6
Wickerhamomyces ciferrii	6
Streptococcus equinus JB1	6
Coleophoma cylindrospora	6
Umezawaea tangerina	6
Fibrobacter sp. UWB8	6
Haloferax mucosum	6
Saccharomyces eubayanus	6
Xanthomonas oryzae	6
Aspergillus aculeatinus CBS 121060	6
Perlucidibaca sp. HR-E	6
(phenylcarbamoylamino)methyl]phenyl	6
Coeligena orina	6
Scytalidium lignicola	6
Enterococcus faecalis TX0031	6
Enterococcus faecalis TX1341	6
14.2.2.1~6,10~]henicosa-1(18),6(21),7,9,16,19-hexaen-2- Yl	6
Hydropsyche angustipennis	6
Enterococcus faecalis TX1322	6
3,2-c]pyridin-2-yl)pyrazol-1-yl]phenyl]methyl	6
Marchantia polymorpha	6
Necropsobacter rosorum	6
Pungitius pungitius	6
Pseudomonas protegens Pf-5	6
(2-amino-2-oxoethyl)-methylsulfonylamino]-5-chlorophenyl	6
Exophiala sideris	6
Rhizopus delemar RA 99-880	6
cyanobacterium TDX16	6
Porphyromonas gingivalis 381	6
Diaporthe helianthi	6
Diversispora versiformis	6
Rhizopus microsporus	6
5-ethoxy-2-fluoro- 3-(propan-2-yloxy)phenyl](4-phenyl-1h-imidazol-2-yl) Methyl	6
Staphylococcus aureus subsp. aureus	6
Smittium mucronatum	6
Haloferax mucosum ATCC BAA-1512	6
Babesia bigemina	6
(2s)-1- Hydroxy-3,3-dimethylbutan-2-yl	6
Xenicus gilviventris	6
Nephila inaurata madagascariensis	6
Grosmannia clavigera kw1407	6
Spodoptera litura nucleopolyhedrovirus	6
Dorcoceras hygrometricum	6
Pseudonocardia ammonioxydans	6
(2s,4r)-6- Carbamimidoyl-4-phenyl-1,2,3,4-tetrahydroquinolin-2-yl	6
Burkholderia pseudomallei MSHR5855	6
Perna picta	6
Burkholderia pseudomallei MSHR5848	6
[truncated: 17,250 more rows]
